# Supplementary material for: The oldest known digestive system consisting of both paired digestive glands and a crop from exceptionally preserved trilobites of the Guanshan Biota (Early Cambrian, China)
Source: PLOS journal article supplement (doi:10.1371/journal.pone.0184982), 2017-09-21
Supplement: S1 (10.1371/journal.pone.0184982.s001) [file journal.pone.0184982.s001]

## S1 File: Supporting figures A-Q

**Associated with:** Hopkins, M.J., Chen, F., Hu, S., and Zhang, Z. The oldest known digestive system consisting of both paired digestive glands and a crop from exceptionally preserved trilobites of the Guanshan Biota (Early Cambrian, China). PLOSone.

This document contains:

**Fig A. Frequency of preservation of digestive system in Guanshan trilobites.** Slab showing specimens of *Palaeolenus lantenoisi*, with white arrows indicating specimens where crop is preserved. Scale bar = 1 cm.

**Fig B. Elemental maps of crop of *Palaeolenus lantenoisi*, GLF WLQ 228A (see also Fig 2).** Upper left corner: all detected elements. Remaining panels: individual elements of higher concentrations, as labeled. Scale bar as in upper left corner.

**Fig C. Elemental maps of digestive glands of *Palaeolenus lantenoisi*, GLF WLQ 228A (see also Fig 2).** Upper left corner: all detected elements. Remaining panels: individual elements of higher concentrations, as labeled. Scale bar as in upper left corner.

**Fig D. Elemental maps of close-up of digestive glands of *Palaeolenus lantenoisi*, GLF WLQ 228A (see also Fig 2).** Upper left corner: all detected elements. Remaining panels: individual elements of higher concentrations, as labeled. Scale bar as in upper left corner.

**Fig E. Elemental maps of mid-thoracic segments of *Palaeolenus lantenoisi*, GLF WLQ 228A (see also Fig 2).** Upper left corner: all detected elements. Remaining panels: individual elements of higher concentrations, as labeled. Scale bar as in upper left corner.

**Fig F. Elemental maps of pygidium of *Palaeolenus lantenoisi*, GLF WLQ 228A (see also Fig 2).** Upper left corner: all detected elements. Remaining panels: individual elements of higher concentrations, as labeled. Scale bar as in upper left corner.

**Fig G. Elemental maps of red staining posterior to pygidium of *Palaeolenus lantenoisi*, GLF WLQ 228A (see also Fig 2).** Upper left corner: all detected elements. Remaining panels: individual elements of higher concentrations, as labeled. Scale bar as in upper left corner.

**Fig H. Elemental maps of cranium of *Palaeolenus lantenoisi*, GLF WLQ 214A (see also Fig 3E-4F).** Upper left corner: all detected elements. Remaining panels: individual elements of higher concentrations, as labeled. Scale bar as in upper left corner.

**Fig I. Elemental maps of crop of *Palaeolenus lantenoisi*, GLF WLQ 174 (see also Figs 3A-3D).** Upper left corner: all detected elements. Remaining panels: individual elements of higher concentrations, as labeled. Scale bar as in upper left corner.

**Fig J. Elemental maps of cranidium of *Palaeolenus lantenoisi*, GLF WLQ 212A (see also Figs 3G and 3I).** Upper left corner: all detected elements. Remaining panels: individual elements of higher concentrations, as labeled. Scale bar as in upper left corner.

**Fig K. Elemental maps of thorax of *Palaeolenus lantenoisi*, GLF WLQ 212A (see also Figs 3H-3I).** Upper left corner: all detected elements. Remaining panels: individual elements of higher concentrations, as labeled. Scale bar as in upper left corner.

**Fig L. Elemental maps of crop of *Redlichia mansuyi*, GLF WLQ 245A (see also Figs 3J-3K).** Upper left corner: all detected elements. Remaining panels: individual elements of higher concentrations, as labeled. Scale bar as in upper left corner.

**Fig M. Elemental maps of left half of cranidium of *Redlichia mansuyi*?, GLF WLQ 029A.** Upper left corner: all detected elements. Remaining panels: individual elements of higher concentrations, as labeled. Scale bar as in upper left corner.

**Fig N. Elemental maps of thoracic pleural spine of *Redlichia* sp., GLF WLQ 244A.** Upper left corner: all detected elements. Remaining panels: individual elements of higher concentrations, as labeled. Scale bar as in upper left corner.

**Fig O. Elemental maps of crop of *Redlichia mansuyi*, GLF WLQ 216A (see also Fig 4).** Upper left corner: all detected elements. Remaining panels: individual elements of higher concentrations, as labeled. Scale bar as in upper left corner.

**Fig P. Elemental maps of the spherical aggregates (close up) in crop of *Redlichia mansuyi*, GLF WLQ 216A (see also Fig 4).** Upper left corner: all detected elements. Remaining panels: individual elements of higher concentrations, as labeled. Scale bar as in upper left corner.

**Fig Q. EDS spectrum of spherical aggregates in crop of *Redlichia mansuyi*, GLF WLQ 216A (area shown in Figs 4E-4G and Fig P).**

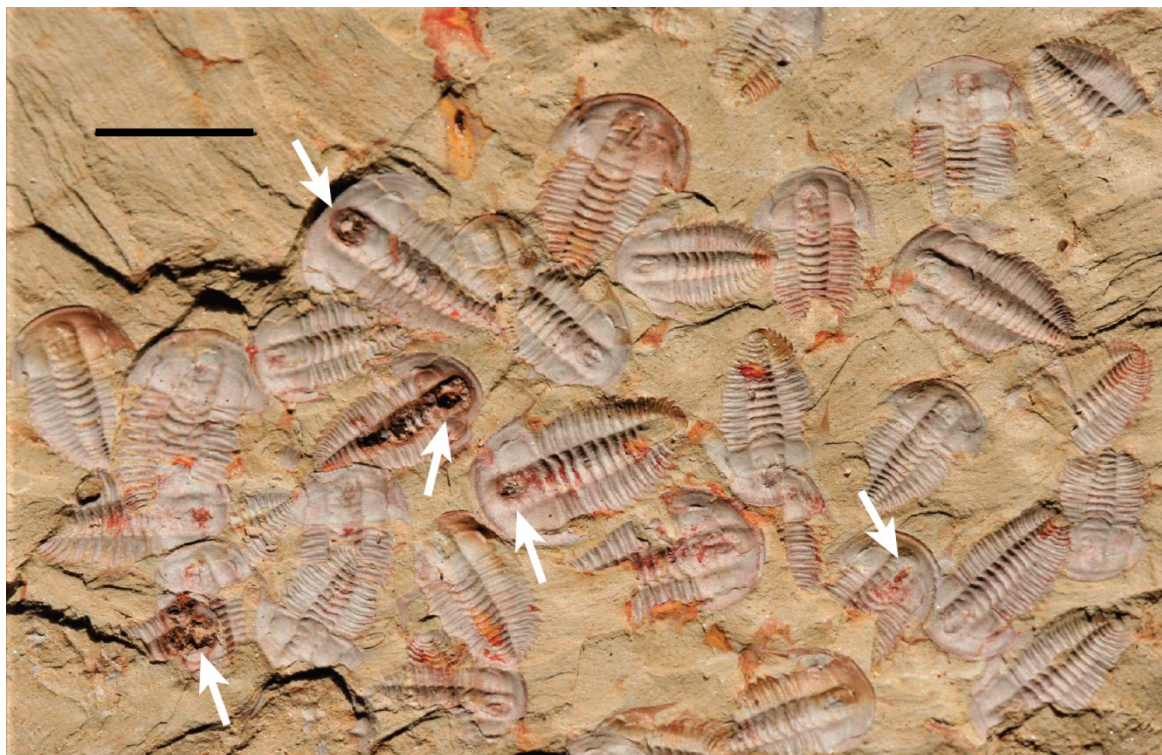

Fig A. Frequency of preservation of digestive system in Guanshan trilobites. Slab showing specimens of *Palaeolenus lantenoisi*, with white arrows indicating specimens where crop is preserved. Scale bar = 1 cm.

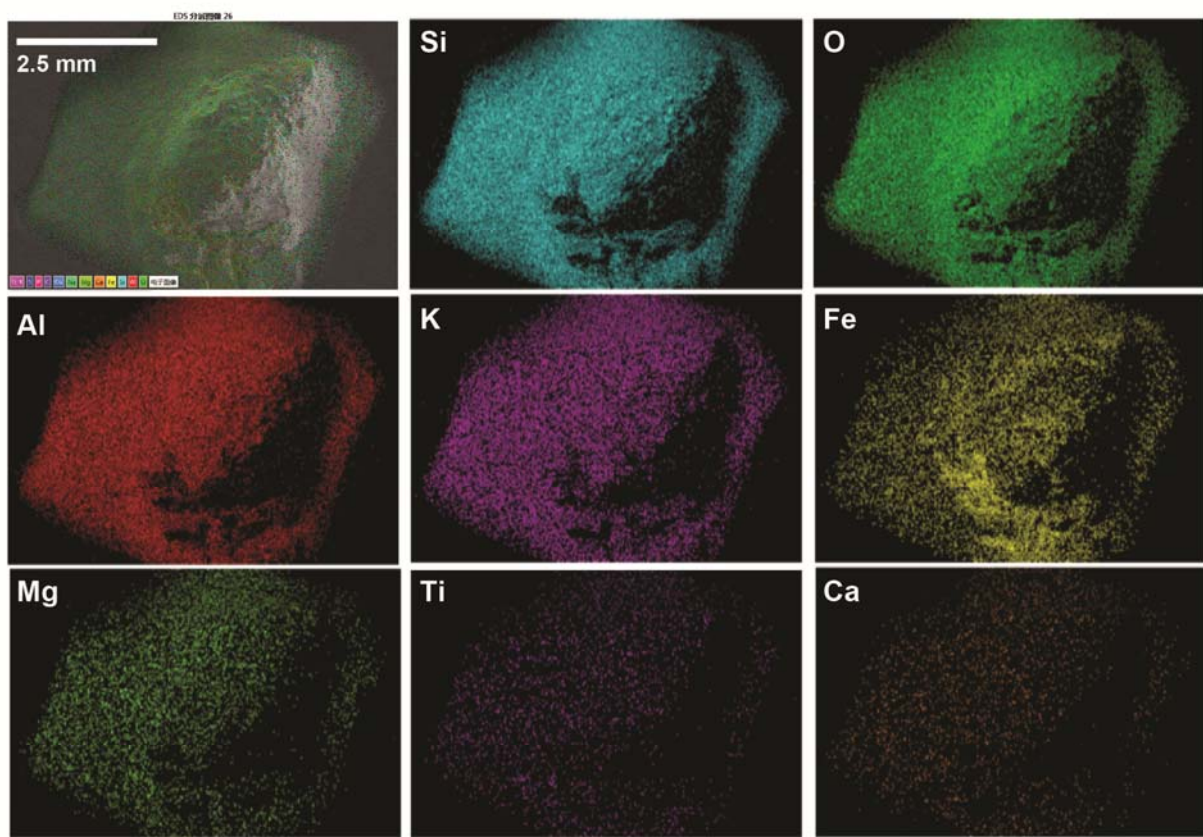

Fig B. Elemental maps of crop of *Palaeolenus lantenoisi*, GLF WLQ 228A (see also Figure 2). Upper left corner: all detected elements. Remaining panels: individual elements of higher concentrations, as labeled. Scale bar as in upper left corner.



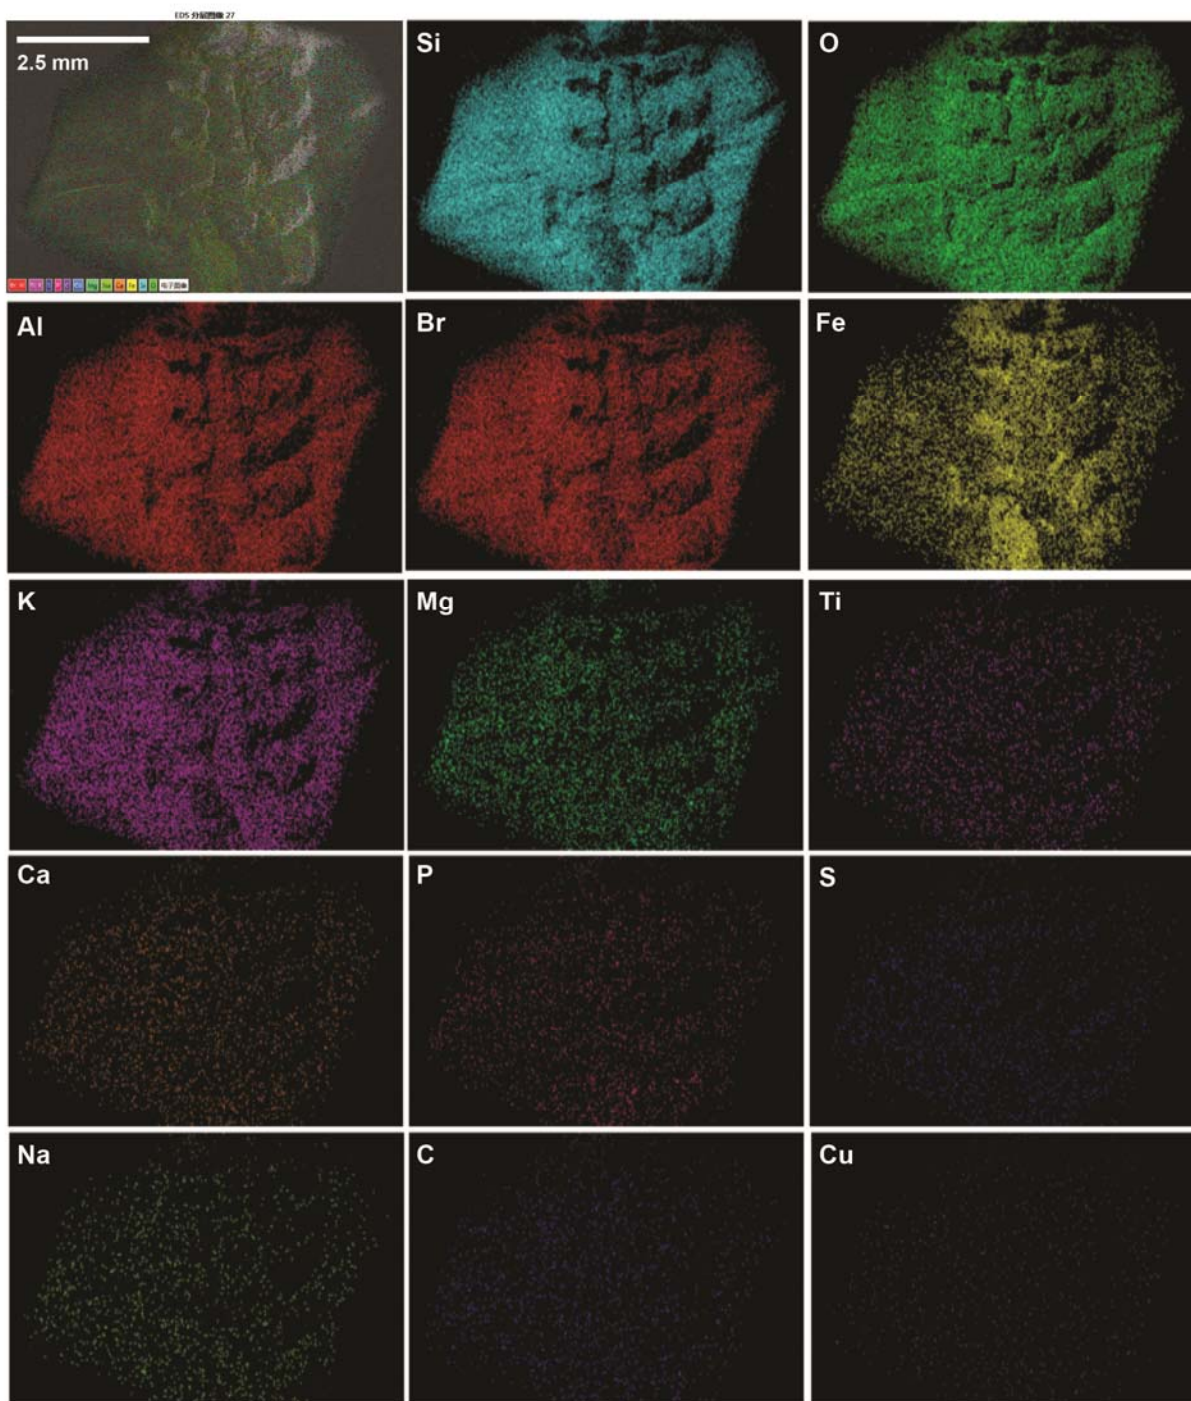

Fig C. Elemental maps of digestive glands of *Palaeolenus lantenoisi*, GLF WLQ 228A (see also Figure 2). Upper left corner: all detected elements. Remaining panels: individual elements of higher concentrations, as labeled. Scale bar as in upper left corner.

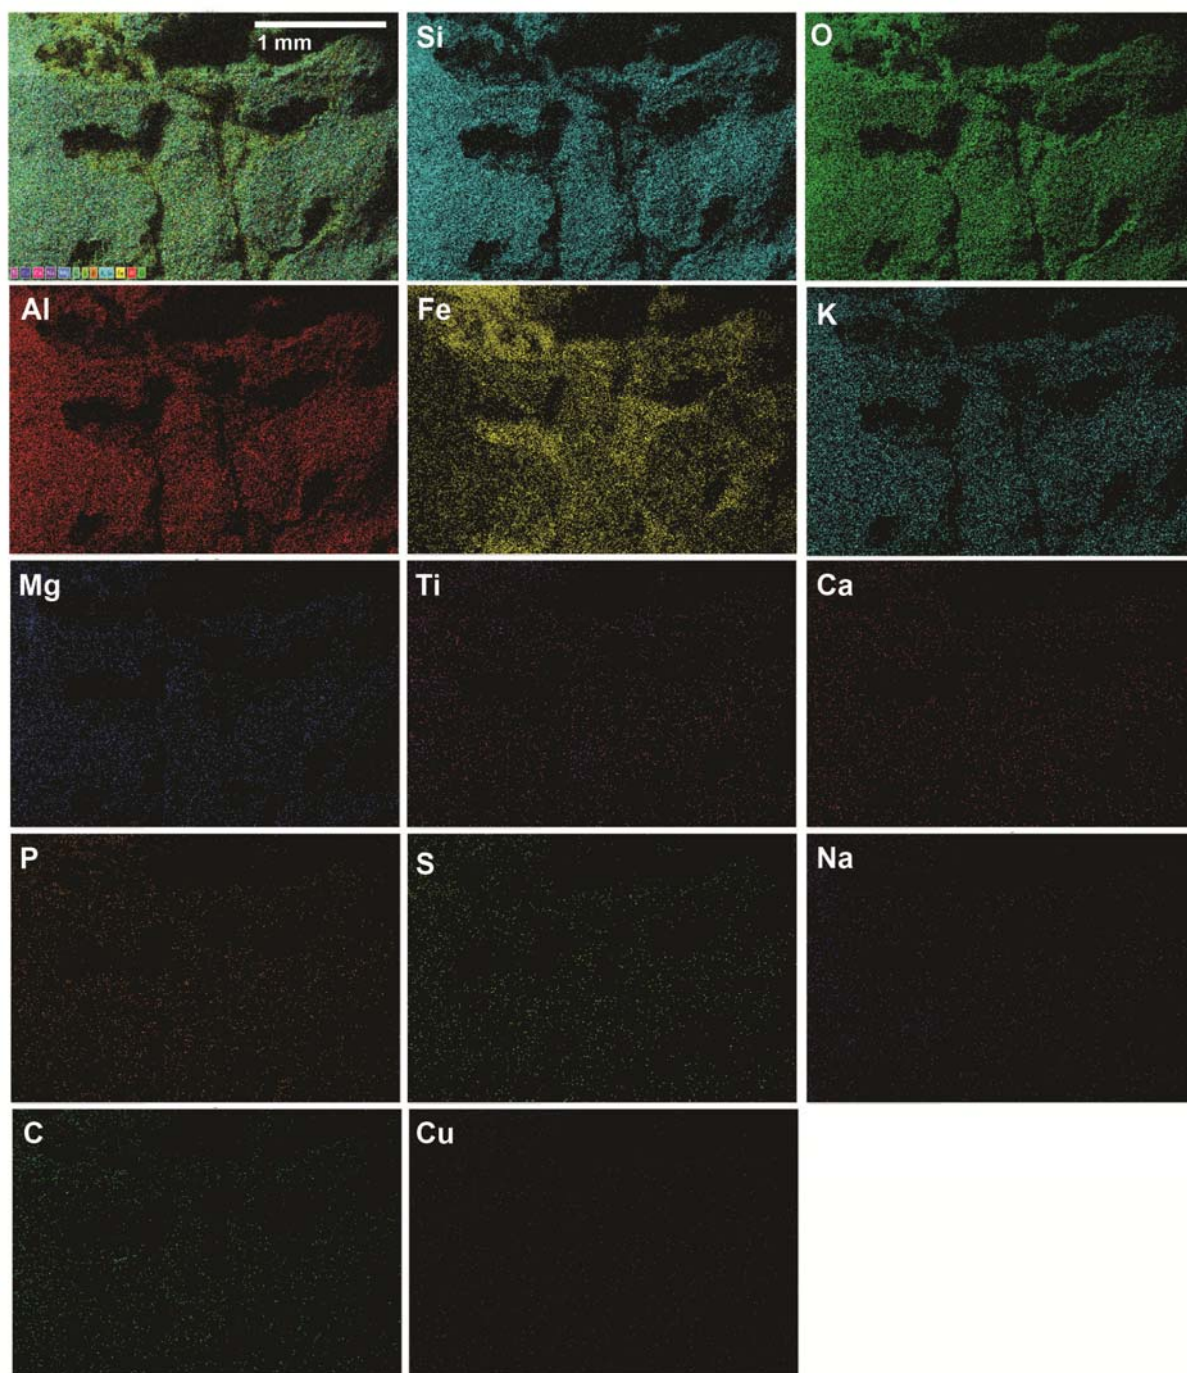

Fig D. Elemental maps of close-up of digestive glands of *Palaeolenus lantenoisi*, GLF WLQ 228A (see also Figure 2). Upper left corner: all detected elements. Remaining panels: individual elements of higher concentrations, as labeled. Scale bar as in upper left corner.



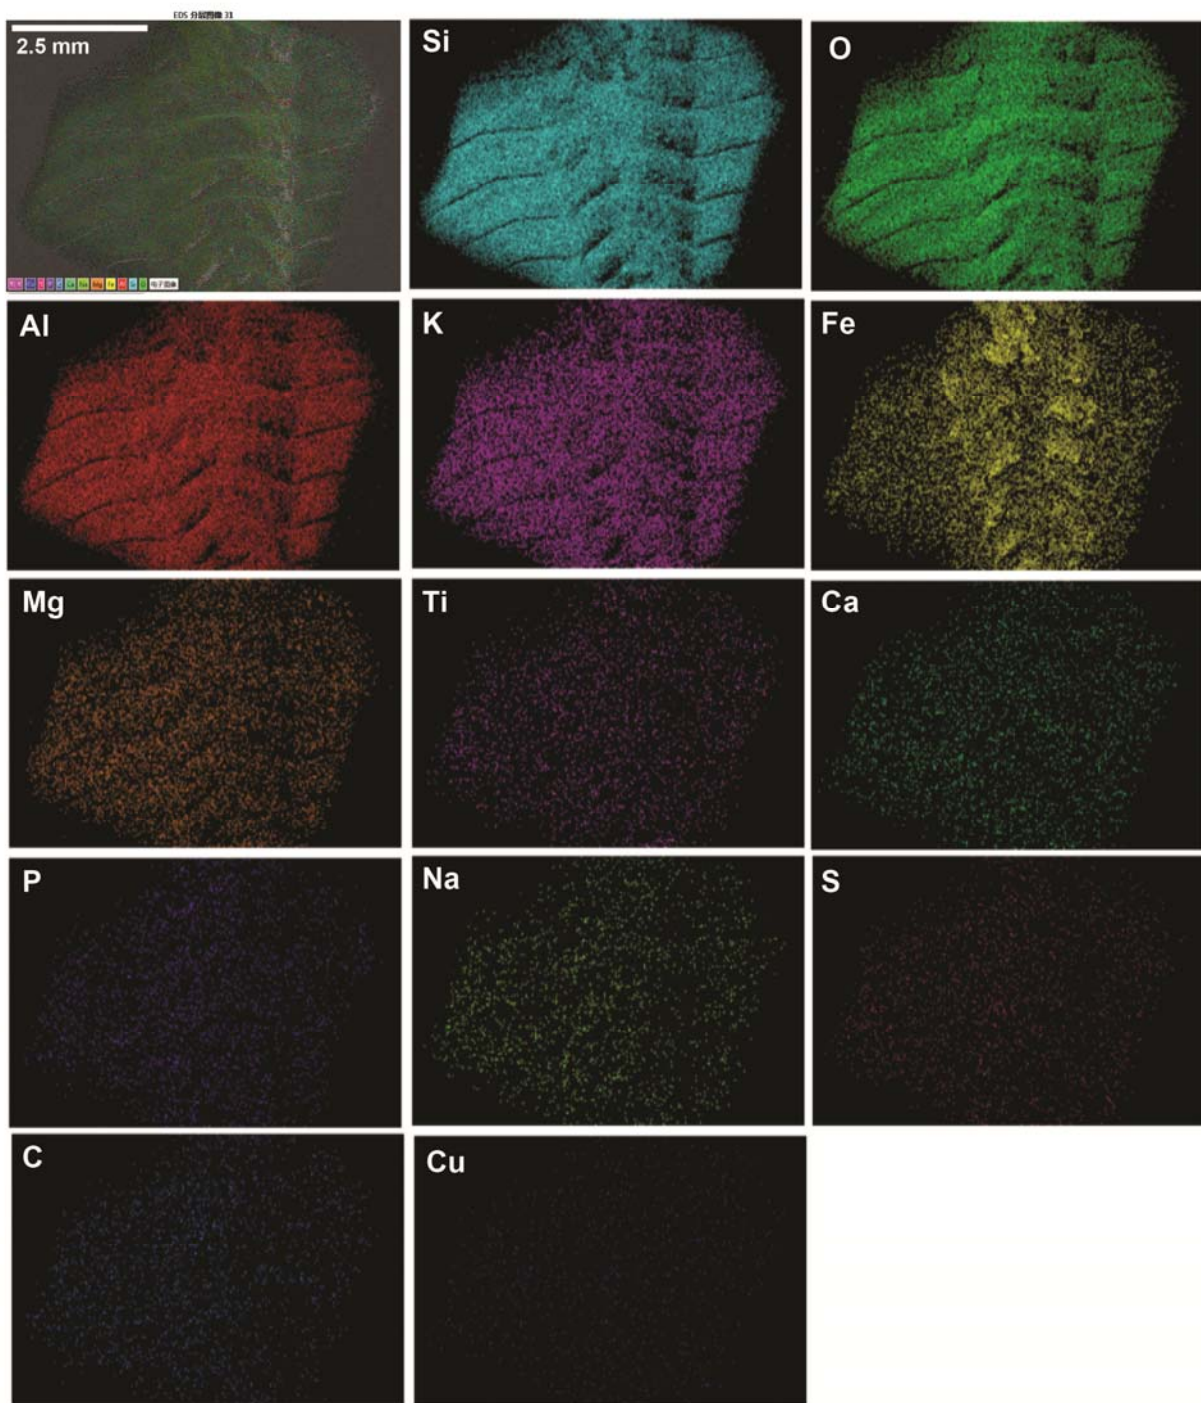

Fig E. Elemental maps of mid-thoracic segments of *Palaeolenus lantenoisi*, GLF WLQ 228A (see also Figure 2). Upper left corner: all detected elements. Remaining panels: individual elements of higher concentrations, as labeled. Scale bar as in upper left corner.

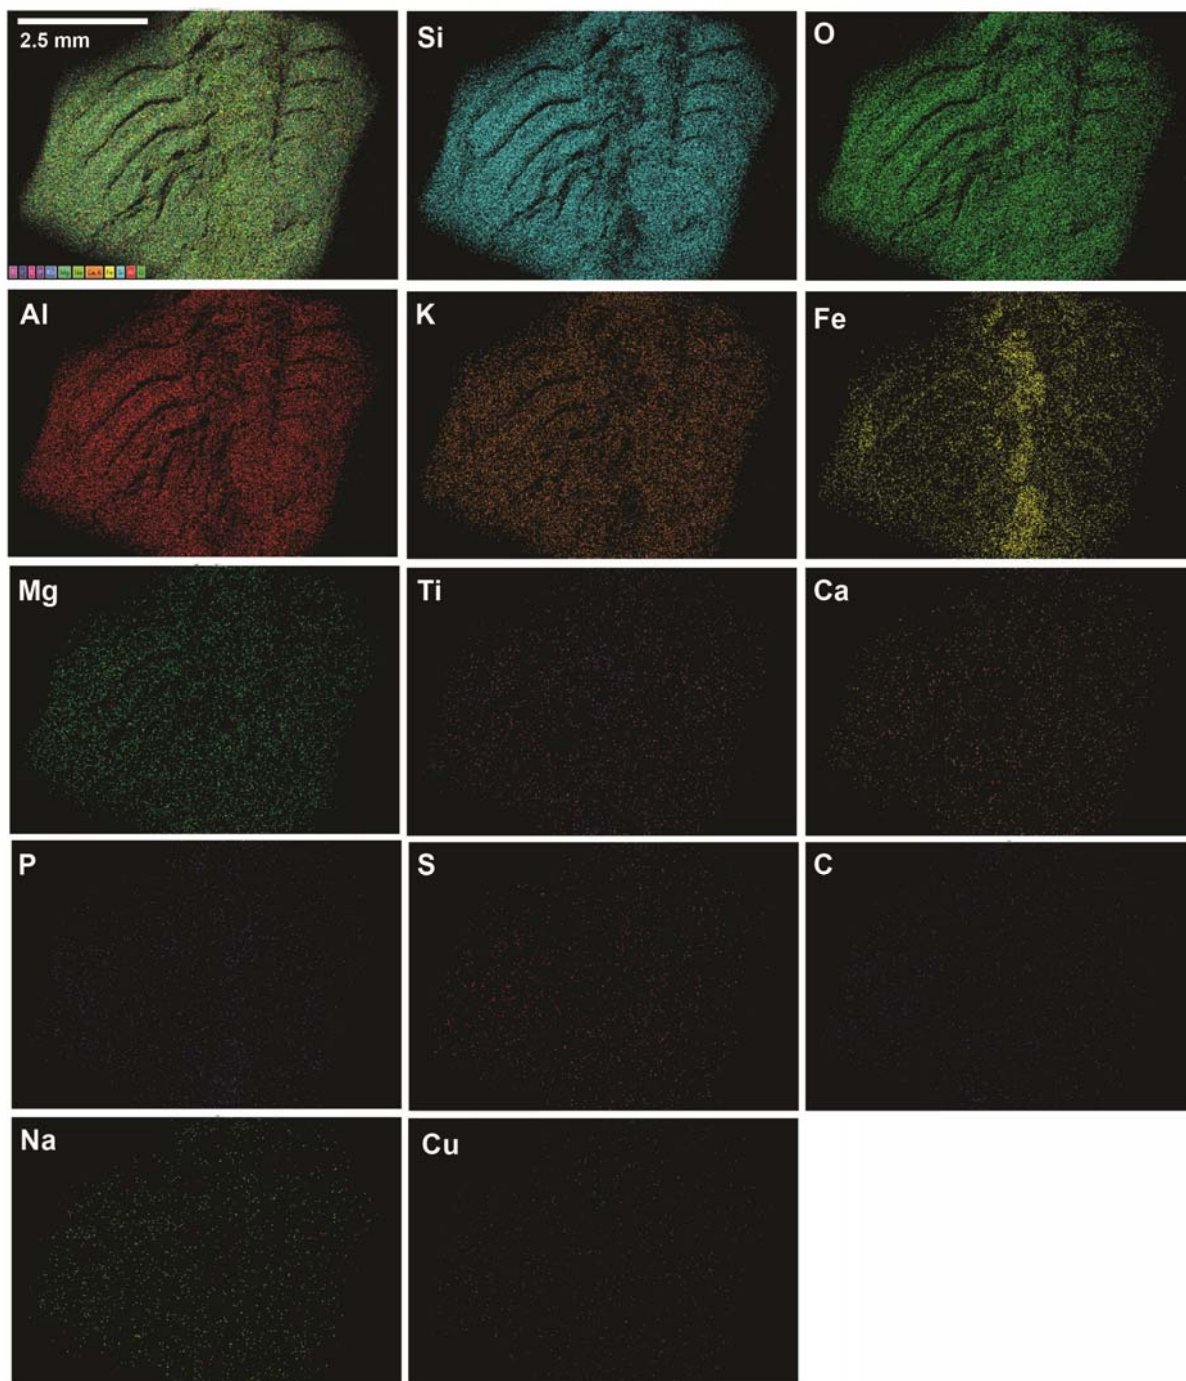

Fig F. Elemental maps of pygidium of *Palaeolenus lantenoisi*, GLF WLQ 228A (see also Figure 2). Upper left corner: all detected elements. Remaining panels: individual elements of higher concentrations, as labeled. Scale bar as in upper left corner.



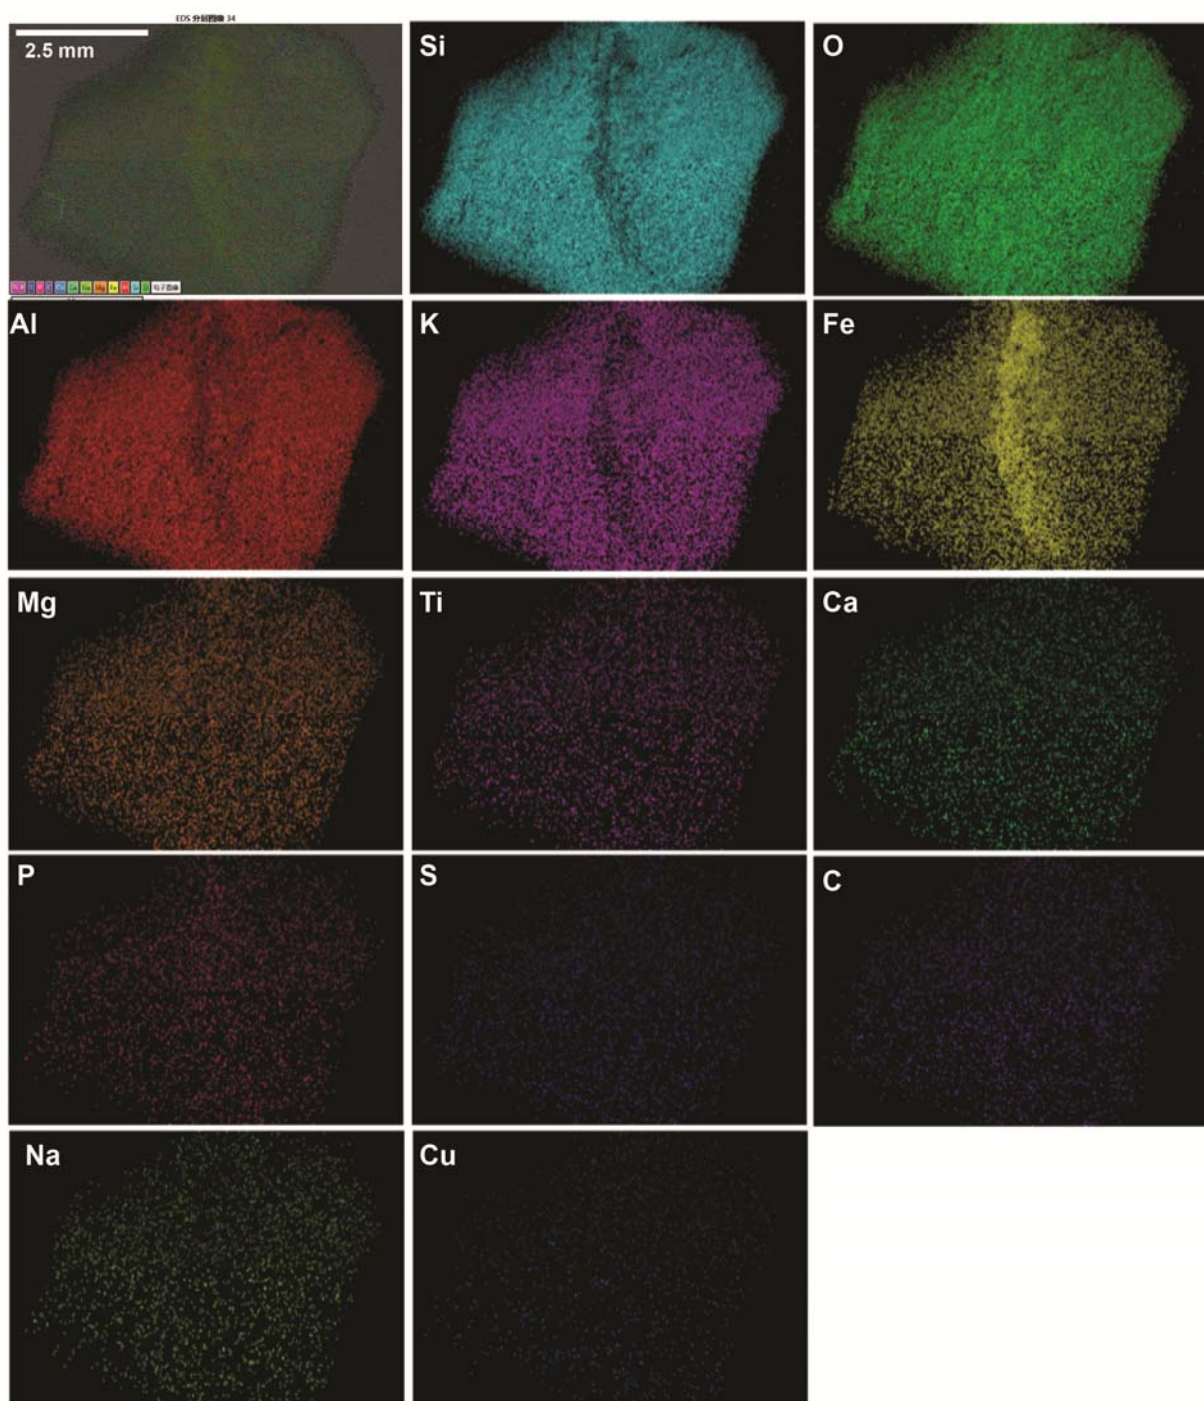

**Fig G.** Elemental maps of red staining posterior to pygidium of *Palaeolenus lantenoisi*, GLF WLQ 228A (see also Figure 2). Upper left corner: all detected elements. Remaining panels: individual elements of higher concentrations, as labeled. Scale bar as in upper left corner.

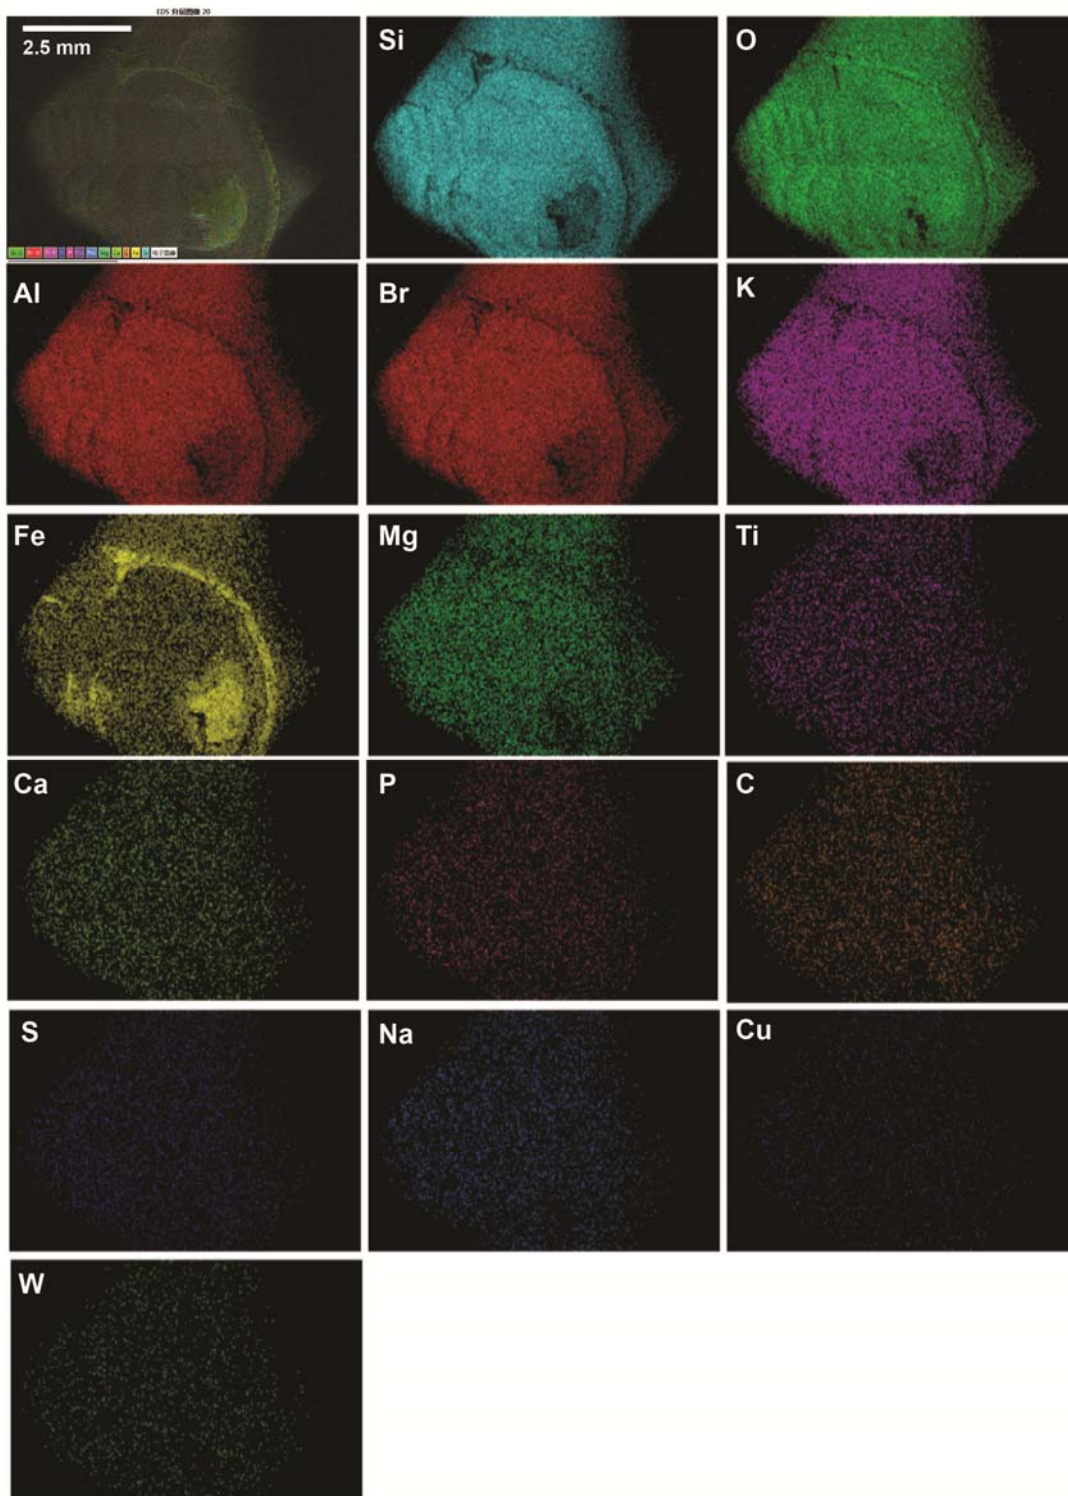

**Fig H.** Elemental maps of cranidium of *Palaeolenus lantenoisi*, GLF WLQ 214A (see also Figure 3E-3F). Upper left corner: all detected elements. Remaining panels: individual elements of higher concentrations, as labeled. Scale bar as in upper left corner.



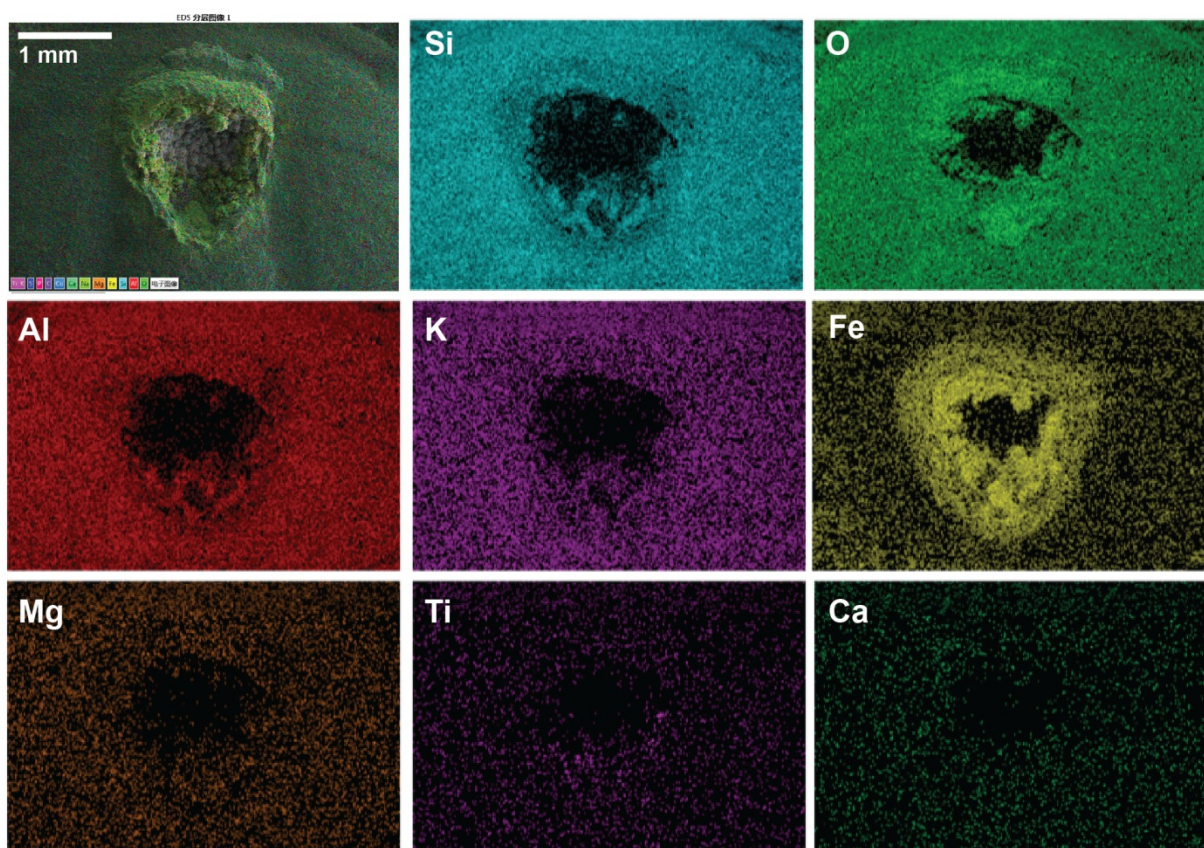

**Fig I.** Elemental maps of crop of *Palaeolenus lantenoisi*, GLF WLQ 174 (see also Figure 3A-3D). Upper left corner: all detected elements. Remaining panels: individual elements of higher concentrations, as labeled. Scale bar as in upper left corner.



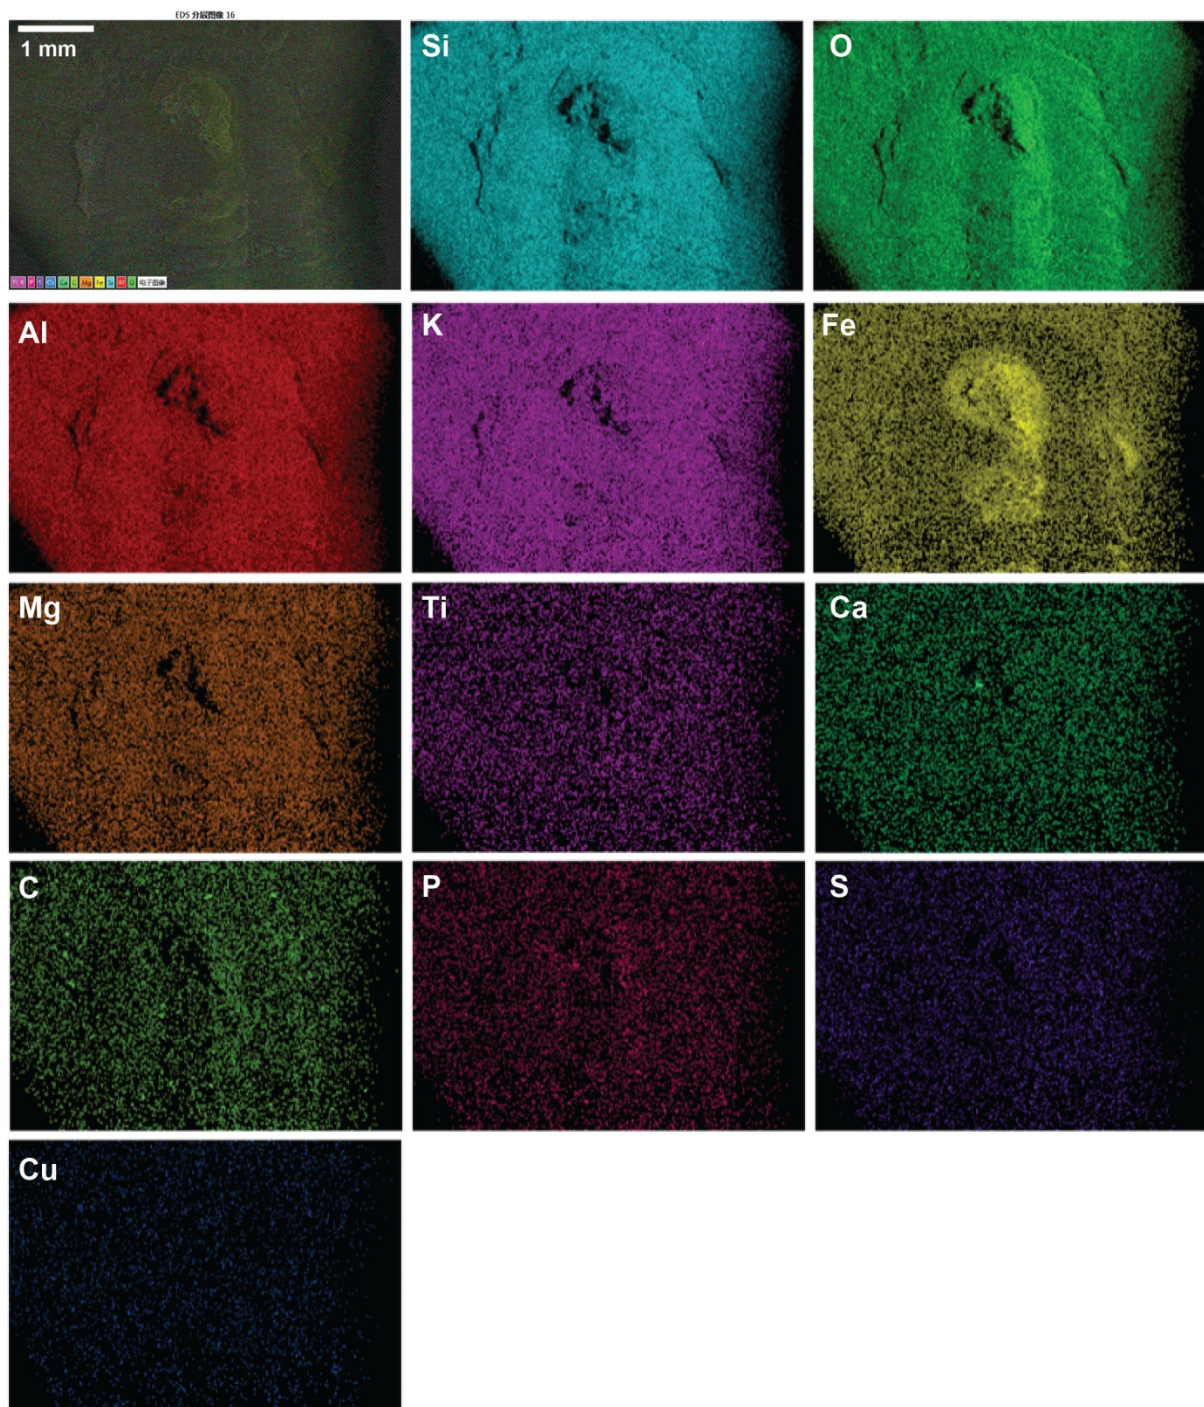

**Fig J.** Elemental maps of cranium of *Palaeolenus lantenoisi*, GLF WLQ 212A (see also Figure 3G, 3I). Upper left corner: all detected elements. Remaining panels: individual elements of higher concentrations, as labeled. Scale bar as in upper left corner.



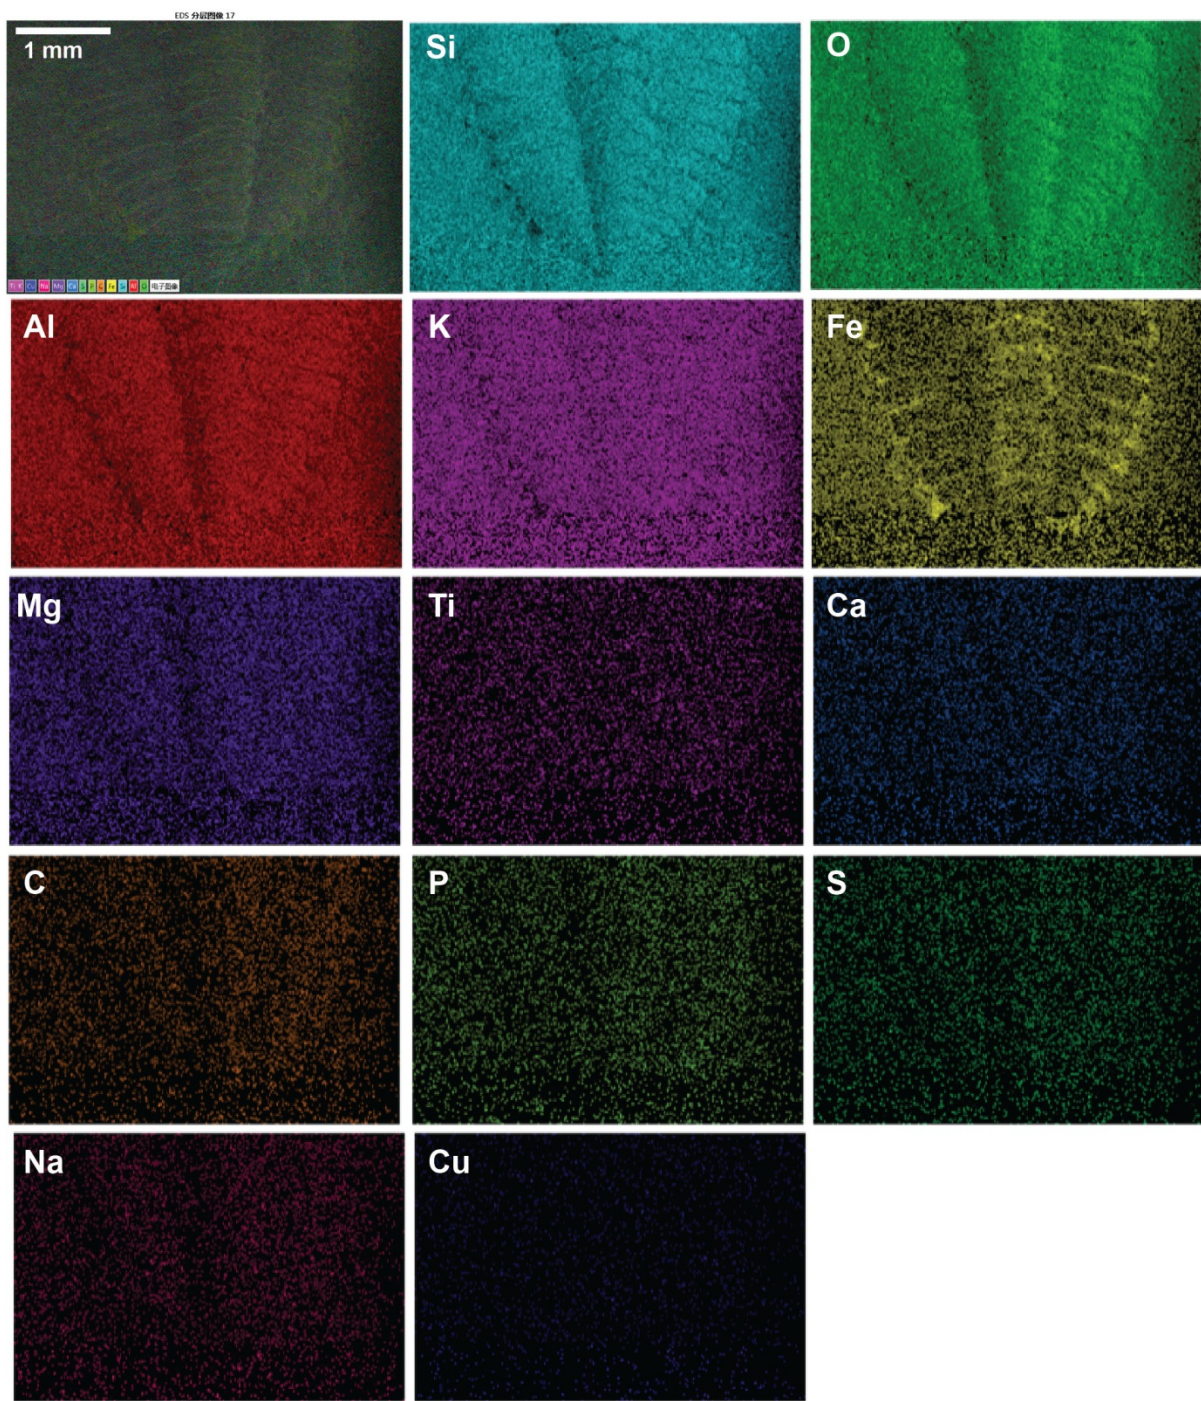

**Fig K.** Elemental maps of thorax of *Palaeolenus lantenoisi*, GLF WLQ 212A (see also Figure 3H-3I). Upper left corner: all detected elements. Remaining panels: individual elements of higher concentrations, as labeled. Scale bar as in upper left corner.



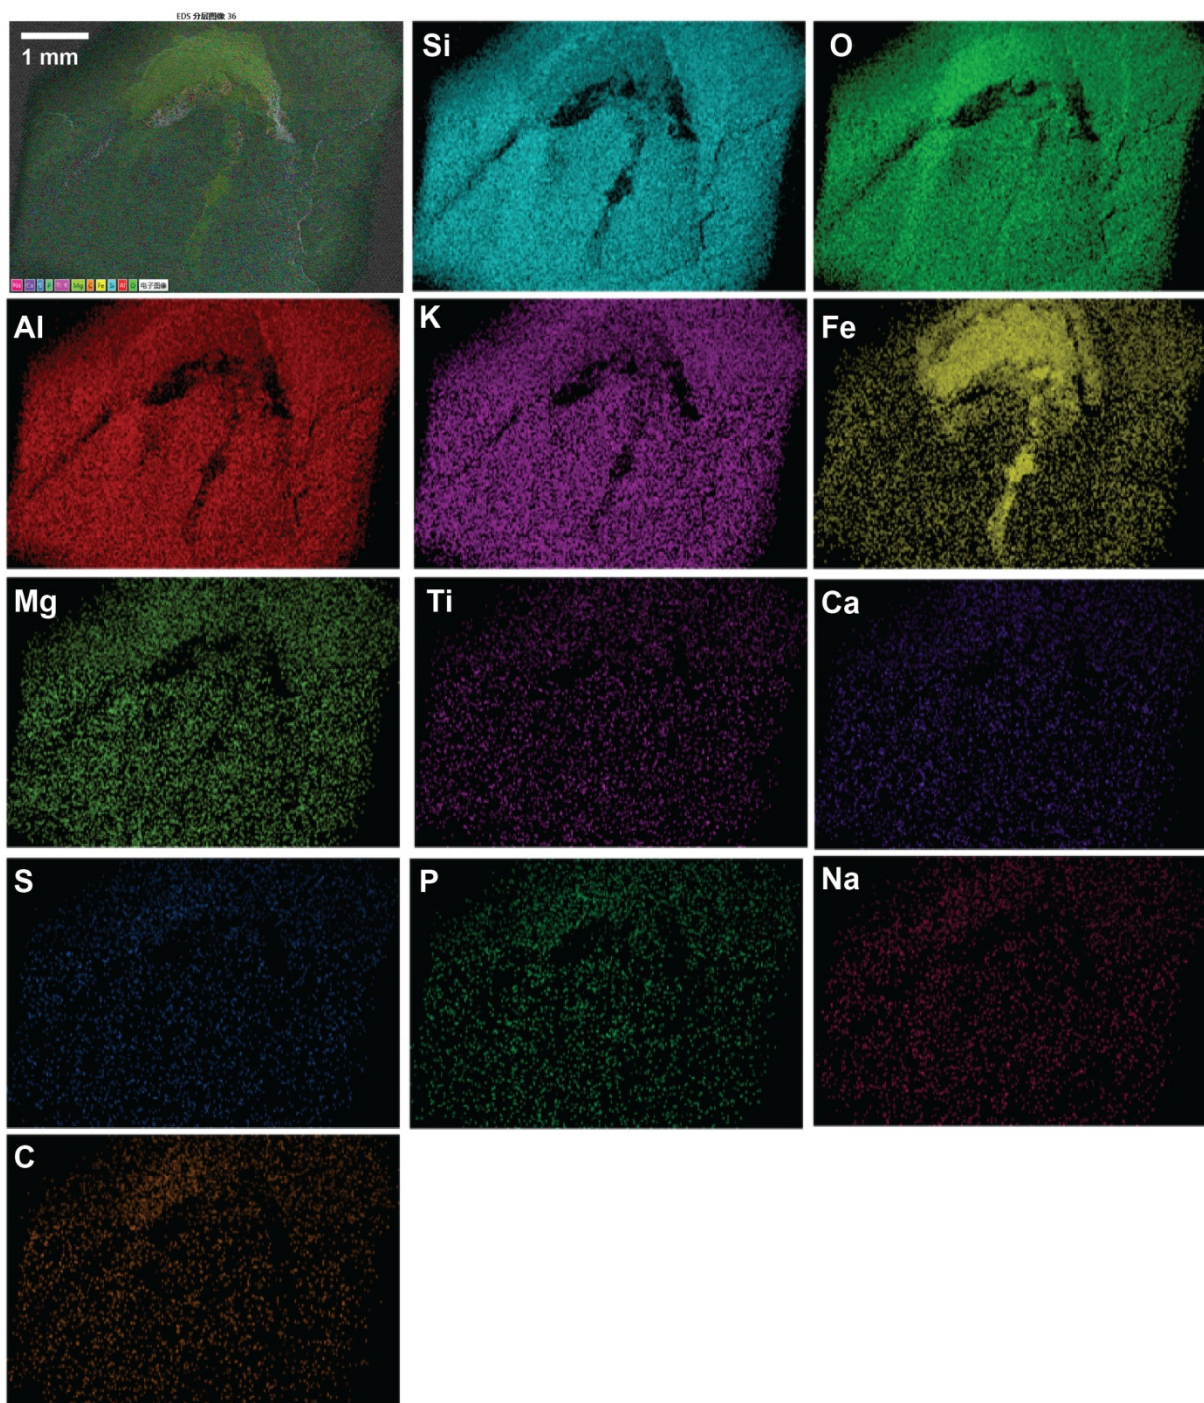

**Fig L.** Elemental maps of crop of *Redlichia mansuyi*, GLF WLQ 245A (see also Figure 3J-3K). Upper left corner: all detected elements. Remaining panels: individual elements of higher concentrations, as labeled. Scale bar as in upper left corner.



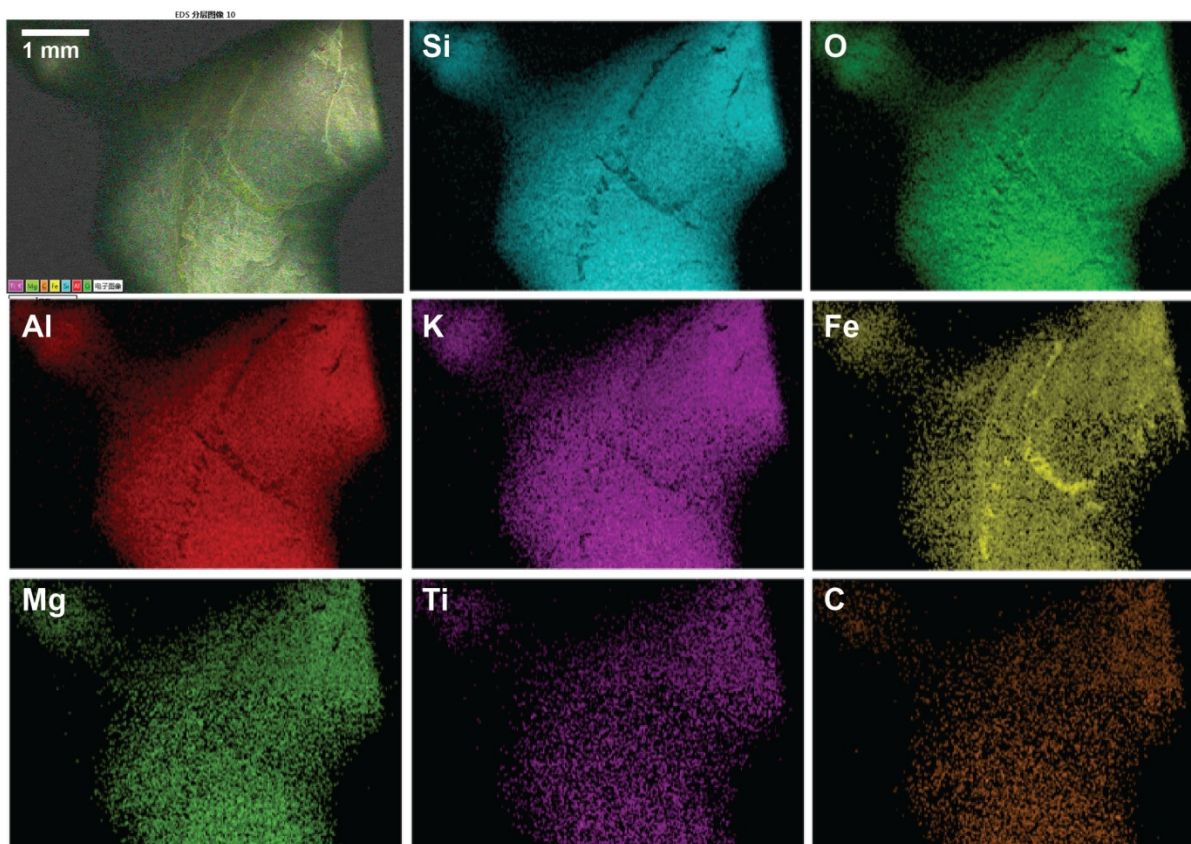

**Fig M.** Elemental maps of left half of cranium of *Redlichia mansuyi*?, GLF WLQ 029A. Upper left corner: all detected elements. Remaining panels: individual elements of higher concentrations, as labeled. Scale bar as in upper left corner.

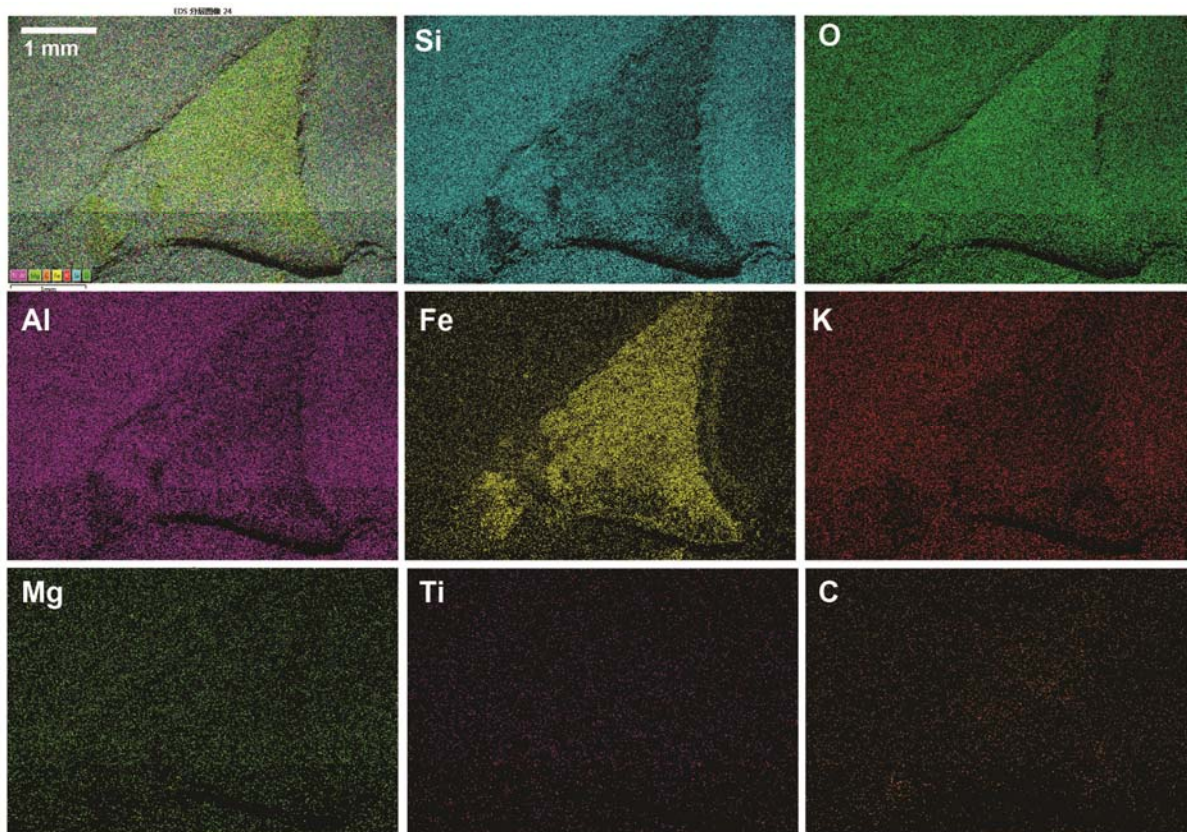

**Fig N.** Elemental maps of thoracic pleural spine of *Redlichia sp.*, GLF WLQ 244A. Upper left corner: all detected elements. Remaining panels: individual elements of higher concentrations, as labeled. Scale bar as in upper left corner.



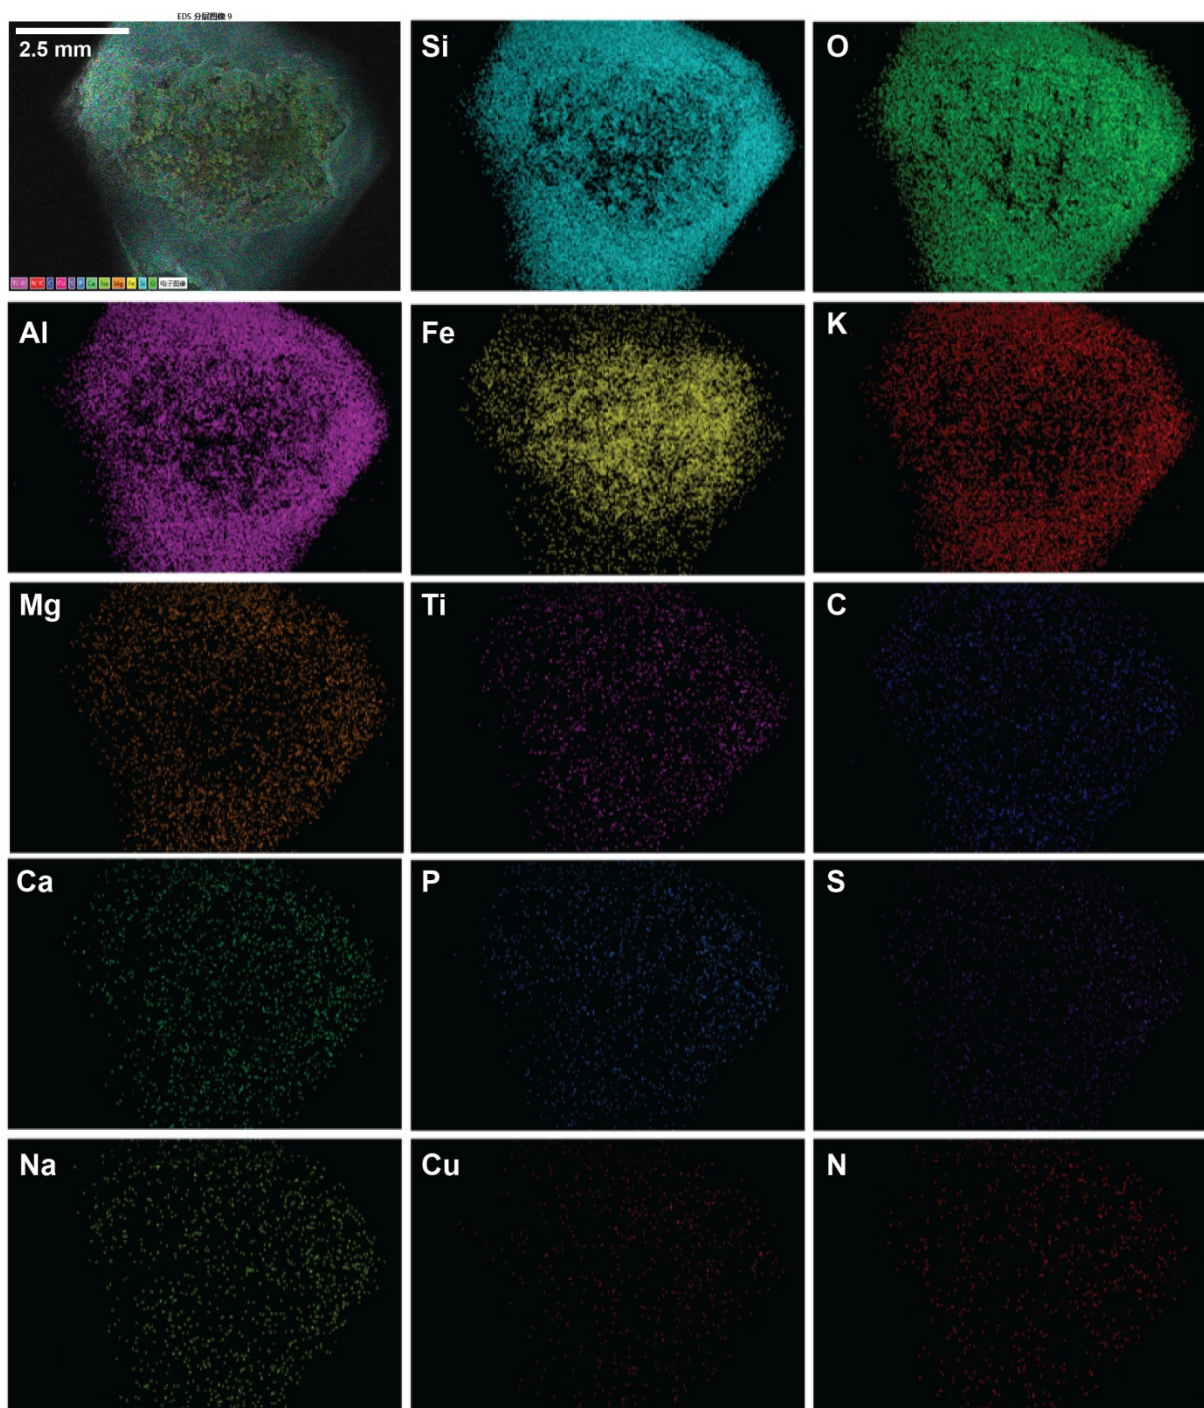

**Fig O.** Elemental maps of crop of *Redlichia mansuyi*, GLF WLQ 216A (see also Figure 4). Upper left corner: all detected elements. Remaining panels: individual elements of higher concentrations, as labeled. Scale bar as in upper left corner.



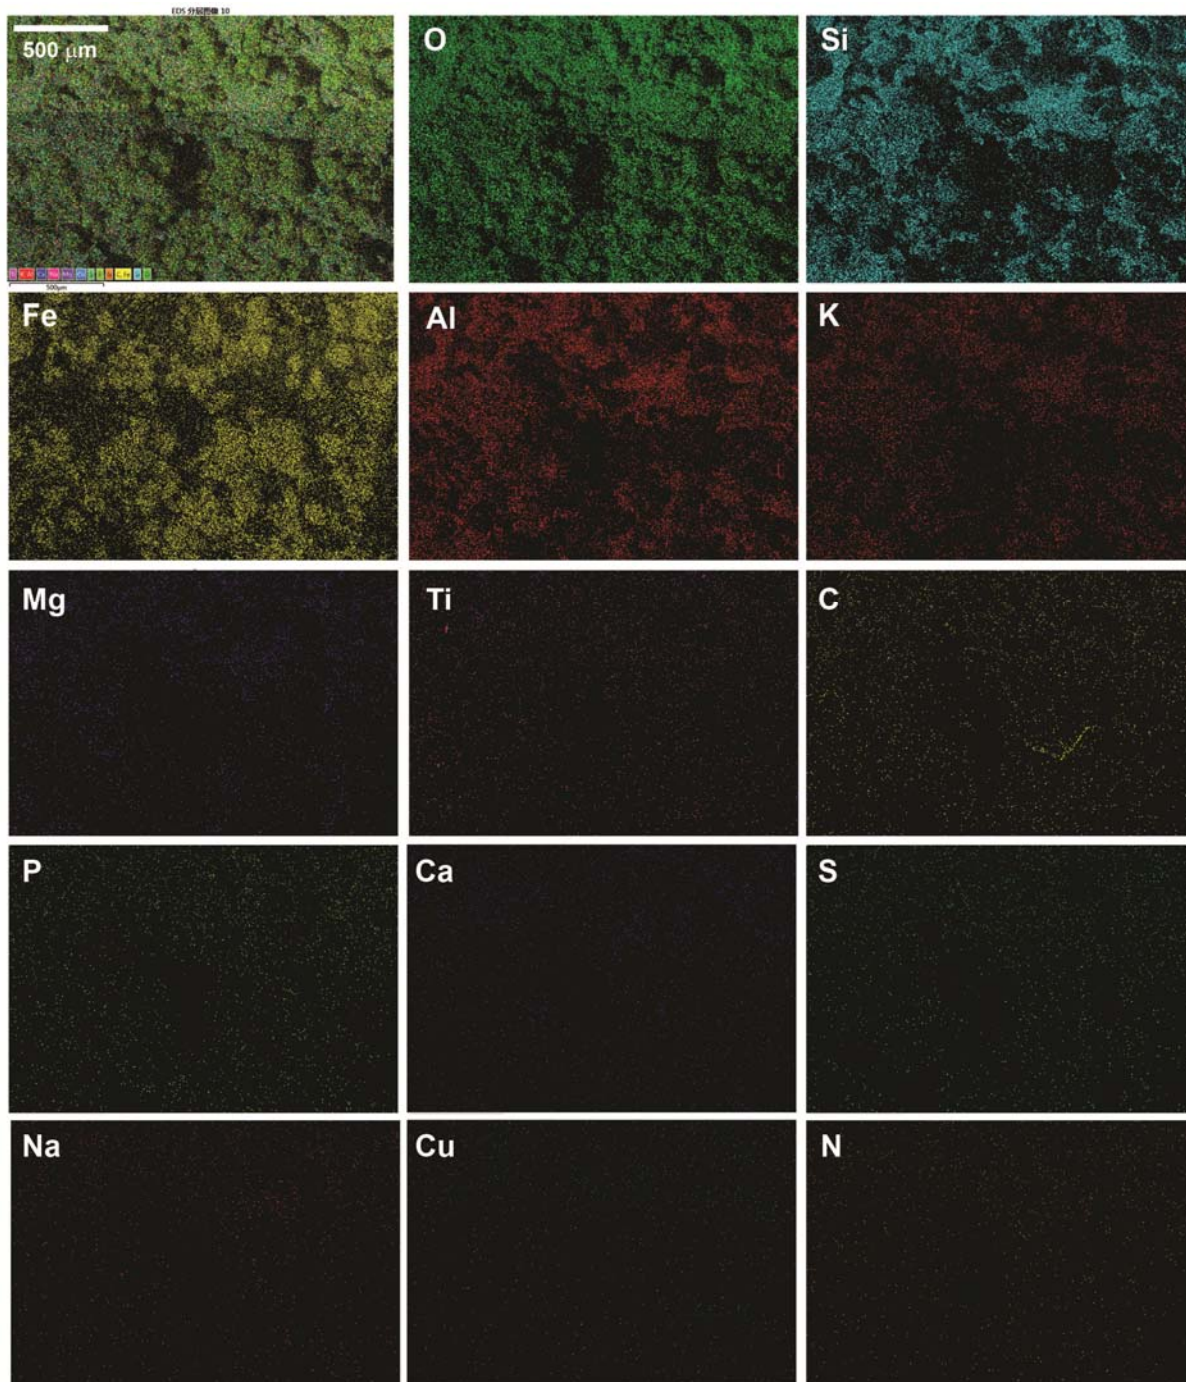

**Fig P.** Elemental maps of spherical aggregates in crop of *Redlichia mansuyi*, GLF WLQ 216A (see also Figure 4). Upper left corner: all detected elements. Remaining panels: individual elements of higher concentrations, as labeled. Scale bar as in upper left corner.

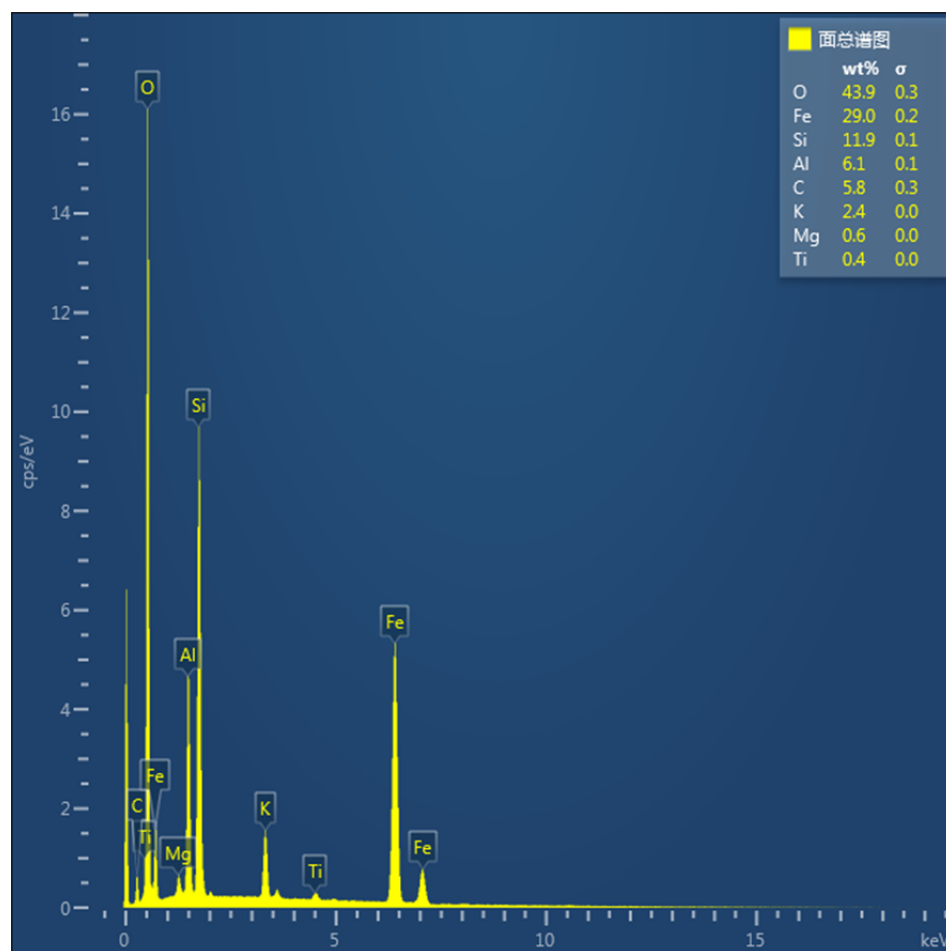

**Fig Q.** EDS spectrum of spherical aggregates in crop of *Redlichia mansuyi*, GLF WLQ 216A (area shown in Figure 4E-G and Figure S16).
